# Supplementary material for: Cell-Penetrating Peptides Selectively Cross the Blood-Brain Barrier In Vivo
Source: PubMed Central journal article supplement (PMC4605843; doi:10.1371/journal.pone.0139652), 2015-10-14

**S2 Fig. Identification of metabolite of pVEC formed during incubation in mouse serum.**

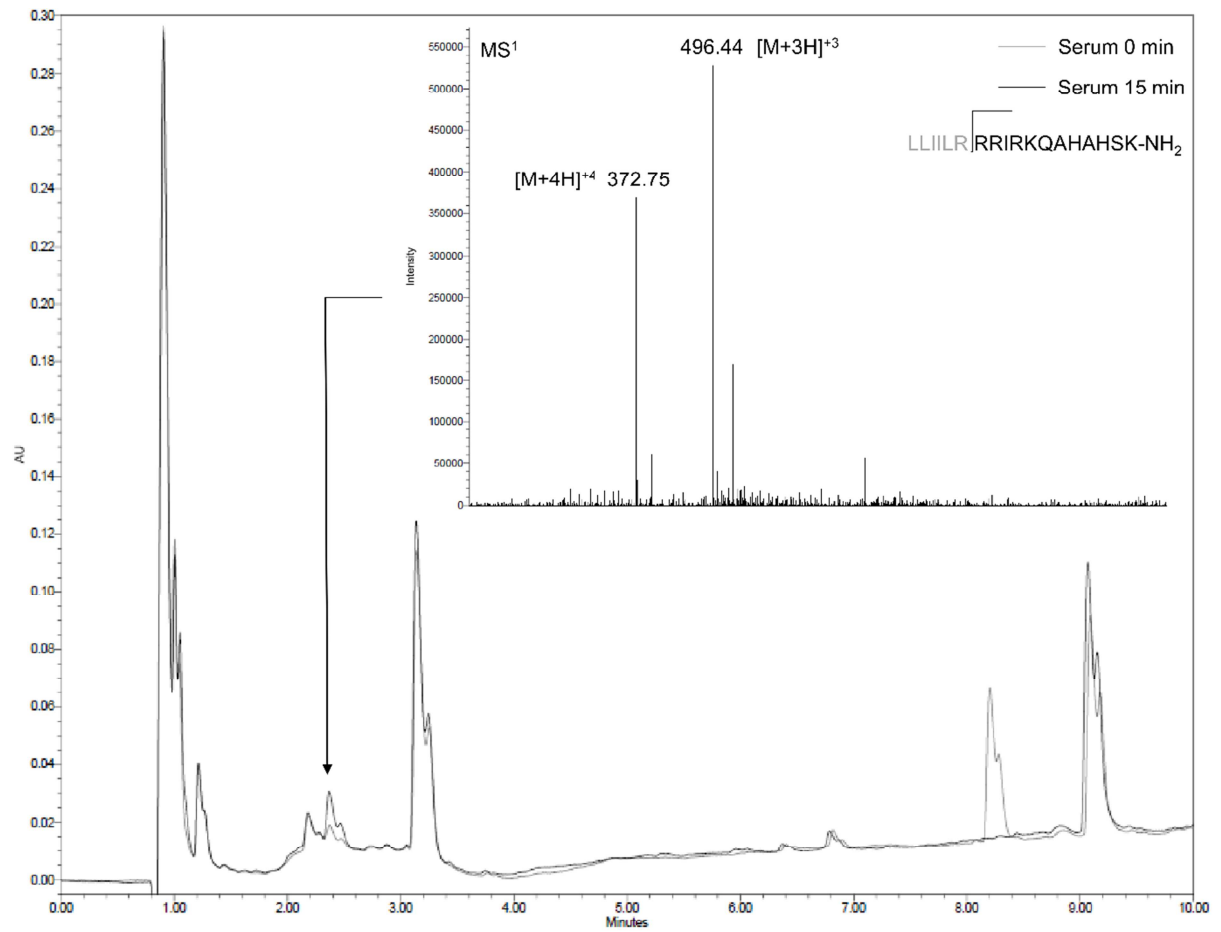

Supplement: pone.0139652.s002.pdf [file pone.0139652.s002.pdf]
