# Supplementary material for: Cell-Penetrating Peptides Selectively Cross the Blood-Brain Barrier In Vivo
Source: PubMed Central journal article supplement (PMC4605843; doi:10.1371/journal.pone.0139652), 2015-10-14
Supplement: pone.0139652.s003.pdf [file pone.0139652.s003.pdf]

## Supplementary Information

**S1 Table. Overview literature studies describing brain delivery by cell-penetrating peptides.**

| CPP               | Cargo                              | Technique                                                                                                                                                                     | <i>In vivo/ in vitro</i> | (Quantitative) result*                                                                                                                                                                   | Reference |
|-------------------|------------------------------------|-------------------------------------------------------------------------------------------------------------------------------------------------------------------------------|--------------------------|------------------------------------------------------------------------------------------------------------------------------------------------------------------------------------------|-----------|
| SynB1             | Benzylpenicillin                   | <i>In situ</i> brain perfusion in rats (single time) + capillary depletion                                                                                                    | <i>In vivo</i>           | Q: Without SynB1: $K_{in} = 0.15 \mu\text{l/s/g} \leftrightarrow$ coupled to SynB1: $K_{in} = 1.14 \mu\text{l/s/g}$ . 80% SynB1 coupled benzylpenicillin in parenchyma.                  | [1]       |
| SynB1             | Dalargin                           | <i>In situ</i> brain perfusion (single time) in rats + antinociceptive test                                                                                                   | <i>In vivo</i>           | Q: Without CPP: $V_d = 16.7 \mu\text{l/g} \leftrightarrow$ coupled to SynB1: $V_d = 309 \mu\text{l/g}$ . Enhancement of analgesic activity.                                              | [2]       |
| SynB1             | Doxorubicin                        | <i>In situ</i> brain perfusion in rats (single time) + capillary depletion                                                                                                    | <i>In vivo</i>           | Q: Without CPP: $K_{in} = 0.25 \mu\text{l/s/g} \leftrightarrow$ coupled to SynB1: $K_{in} = 1.50 \mu\text{l/s/g}$ . 70% SynB1 coupled benzylpenicillin in parenchyma.                    | [3]       |
| SynB1             | Doxorubicin                        | <i>In situ</i> brain perfusion in mice (single time) + capillary depletion                                                                                                    | <i>In vivo</i>           | Q: Without CPP: $V_d = < 100 \mu\text{l/g} \leftrightarrow$ coupled to SynB1: $V_d = 776.4 \mu\text{l/g}$ . 60% SynB1 coupled doxorubicin in parenchyma.                                 | [4]       |
| SynB1             | PEG-gelatin-siloxane nanoparticles | Determination transcellular transport across co-culture BBB model and determination of PG-GS-SynB particles in brain after IV injection of mice using <i>in vivo</i> imaging. | <i>In vitro/ In vivo</i> | D: Vectorizing the nanoparticles with the SynB peptide enhances the transport across the BBB <i>in vitro</i> as well as <i>in vivo</i> .                                                 | [18]      |
| SynB3             | Dalargin                           | <i>In situ</i> brain perfusion (single time) in rats + antinociceptive test                                                                                                   | <i>In vivo</i>           | Q: Without CPP: $V_d = 16.7 \mu\text{l/g} \leftrightarrow$ coupled to SynB3: $V_d = 240 \mu\text{l/g}$ . Enhancement of analgesic activity.                                              | [2]       |
| (L- and D-) SynB3 | Doxorubicin                        | <i>In situ</i> brain perfusion in mice (single time) + capillary depletion                                                                                                    | <i>In vivo</i>           | Q: Without CPP: $V_d = < 100 \mu\text{l/g} \leftrightarrow$ coupled to (L-en D-) SynB3: $V_d = 961.8$ (L) and $788.4$ (D) $\mu\text{l/g}$ . 50% SynB1 coupled doxorubicin in parenchyma. | [4]       |
| SynB3             | Paclitaxel                         | <i>In situ</i> brain perfusion in mice                                                                                                                                        | <i>In vivo</i>           | D: Vectorized paclitaxel bypasses Pgp at luminal side of BBB.                                                                                                                            | [5]       |
| SynB3             | Morphine-6-glucuronide             | <i>In situ</i> brain perfusion in mice + antinociceptive tests                                                                                                                | <i>In vivo</i>           | Q: Without CPP: $K_{in} = 0.024 \mu\text{l/s/g} \leftrightarrow$ coupled to SynB3: $K_{in} = 1.27 \mu\text{l/s/g}$ . Improvement of pharmacological activity.                            | [6]       |

## Supplementary Information

**S1 Table. Overview literature studies describing brain delivery by cell-penetrating peptides.**

| CPP          | Cargo                                          | Technique                                                                                                                                                                    | <i>In vivo/<br/>in vitro</i> | (Quantitative) result*                                                                                                                                         | Reference |
|--------------|------------------------------------------------|------------------------------------------------------------------------------------------------------------------------------------------------------------------------------|------------------------------|----------------------------------------------------------------------------------------------------------------------------------------------------------------|-----------|
| SynB3        | Endomorphin-1<br>(linked by disulfide linkage) | Tail flick antinociceptive test                                                                                                                                              | <i>In vivo</i>               | Q: Five-fold increase in antinociception compared to EM-1 alone.                                                                                               | [39]      |
| D-Penetratin | Doxorubicin                                    | <i>In situ</i> brain perfusion in rats (single time) + capillary depletion.                                                                                                  | <i>In vivo</i>               | Q: Without CPP: $K_{in} = 0.25 \mu\text{l/s/g}$ ↔ coupled to D-Penetratin: $K_{in} = 2.14 \mu\text{l/s/g}$ . 70% SynB1 coupled benzylpenicillin in parenchyma. | [3]       |
| Penetratin   | -                                              | IV injection → stained with fluorescent tag.                                                                                                                                 | <i>In vivo</i>               | D: no staining → no brain influx.                                                                                                                              | [7]       |
| Penetratin   | scFvs                                          | Mice were IV injected with scFv-CPP construct. Then the presence of scFv-CPP in brain cryosections was evaluated after fluorescent labeling using a fluorescence microscope. | <i>In vivo</i>               | D: scFv-CPP construct clearly appeared in brain cells after IV injection.                                                                                      | [26]      |
| Penetratin   | Doxorubicin loaded transferrin liposomes       | The amount of doxorubicin in brain homogenate was evaluated using HPLC at different time points after IV injection in rats.                                                  | <i>In vivo</i>               | Q: Tf-Penetratin liposomes showed maximal brain penetration after 24h (about 3.67% ID/g).                                                                      | [27]      |
| Penetratin   | PEG-PLA nanoparticles loaded with coumarin-6   | <i>In vivo</i> imaging and pharmacokinetic and biodistribution studies using LC-MS/MS analysis of coumarin-6 in brain homogenate.                                            | <i>In vivo</i>               | D: Fluorescence in rat brain was higher for penetratin-NP treated rats than for NP-treated ones. Brain uptake was enhanced when NP was coupled to penetratin.  | [28]      |
| Tat 47-57    | NEP1-40                                        | Focal ischemia model in rats → evaluate outcome after ischemia + detect presence of vectorized NEP1-40.                                                                      | <i>In vivo</i>               | B: Improvement of neurologic outcomes.<br>D: Tat-NEP1-40 detected in brain using Western blot and immunofluorescence.                                          | [8]       |

## Supplementary Information

**S1 Table. Overview literature studies describing brain delivery by cell-penetrating peptides.**

| CPP       | Cargo                                                                      | Technique                                                                                                             | <i>In vivo/ in vitro</i> | (Quantitative) result*                                                                                                                                                                                                                                                                                                                                                                    | Reference |
|-----------|----------------------------------------------------------------------------|-----------------------------------------------------------------------------------------------------------------------|--------------------------|-------------------------------------------------------------------------------------------------------------------------------------------------------------------------------------------------------------------------------------------------------------------------------------------------------------------------------------------------------------------------------------------|-----------|
| Tat 47-57 | NR2B9c                                                                     | Measuring effect of vectorized NR2B9c in a rat stroke model.                                                          | <i>In vivo</i>           | Q: Treatment with Tat-NR2B9c reduced the volume of cerebral infarction with 67% and 87% in cortical infarction volume.                                                                                                                                                                                                                                                                    | [10]      |
| Tat 47-57 | $\beta$ -galactosidase                                                     | Fluorescence confocal microscopy: tissues were dissected from mice 20 min after i.p. injection                        | <i>In vivo</i>           | D: - Tat-FITC: strong signals in all areas of brain (not with control FITC).<br>- Tat- $\beta$ -Gal: brain sections from mice analyzed: 2h post injection, strong activity around capillaries, not in parenchyma, starting from 4h after injection all brain regions showed strong $\beta$ -Gal activity.<br>- BBB remained intact (Evan's blue albumin complexes not in brain sections). | [11]      |
| Tat 47-57 | Green fluorescent protein (GFP)                                            | Evaluation of transcellular transport of Tat-GFP across bEnd-3-astrocyte co-culture layer.                            | <i>In vitro</i>          | D: Tat-GFP was able to translocate bEnd-3 cell layer but not astrocyte layer. No influence on barrier integrity observed.                                                                                                                                                                                                                                                                 | [12]      |
| Tat 47-57 | PEG-b-Chol nanoparticles (loaded with ciprofloxacin, quantum dots or FITC) | Confocal microscopy of rat brain sections 4h after IV injection in the tail vein.                                     | <i>In vivo</i>           | D: Tat-conjugated nanoparticles loaded with FITC or quantum dots crossed the BBB, while FITC and quantum dots alone did not and were localized around blood vessels in the brain.                                                                                                                                                                                                         | [13]      |
| Tat 47-57 | PEG decorated gelatin-siloxane nanoparticles                               | <i>In vivo</i> imaging (mice) and TEM.                                                                                | <i>In vivo</i>           | Q: Tat-modification of the nanoparticles resulted in a quantitatively higher fluorescent signal in the brain than no-Tat nanoparticles (total signal counts of $708.69 \pm 4.8$ counts/(sc $\times$ s) versus $670.47 \pm 8.96$ counts/(sc $\times$ s)). TEM analysis revealed that the BBB remained intact.                                                                              | [14]      |
| Tat 47-57 | $\delta$ -V1-1 (isozyme specific inhibitor of $\delta$ -PKC)               | Two <i>in vivo</i> models of vascular stress: transient focal ischemia in normotensive rats and chronic hypertension. | <i>In vivo</i>           | B: $\delta$ -V1-1-Tat increased the number of patent microvessels by 92% compared to control (Tat) treated animals and increased cerebral blood flow by 26% following acute focal ischemia (not with Tat peptide alone). In chronic hypertension model, the cerebral blood flow increased by 12%.                                                                                         | [15]      |

## Supplementary Information

**S1 Table. Overview literature studies describing brain delivery by cell-penetrating peptides.**

| CPP       | Cargo                                            | Technique                                                                                                                                        | <i>In vivo/<br/>in vitro</i> | (Quantitative) result*                                                                                                                               | Reference |
|-----------|--------------------------------------------------|--------------------------------------------------------------------------------------------------------------------------------------------------|------------------------------|------------------------------------------------------------------------------------------------------------------------------------------------------|-----------|
| Tat 47-57 | PACAP-38                                         | Six hours after i.p. injection of FITC-labeled peptides, the fluorescence intensity of isolated brains was determined.                           | <i>In vivo</i>               | B: PACAP-Tat showed a 2.5 fold higher efficiency to traverse the BBB than PACAP.                                                                     | [16]      |
| Tat 47-57 | GDNF                                             | Evaluation of cryosections of mouse brain 4h post i.p. injection using fluorescence microscopy.                                                  | <i>In vivo</i>               | D: The fusion proteins crossed the BBB and transduced the brain parenchyma.                                                                          | [17]      |
| Tat 47-57 | PEG-cholesterol (PEG-b-Col) nanoparticles        | Evaluation of presence of FITC loaded PEG-b-Col-Tat nanoparticles in brain cryosections using confocal microscope 4h after IV injection of rats. | <i>In vivo</i>               | D: PEG-b-Col-Tat particles crossed the BBB.                                                                                                          | [19]      |
| Tat 47-57 | Bcl-X <sub>L</sub>                               | Evaluation of infarct volume and neurological deficit in ischemic insult mice model.                                                             | <i>In vivo</i>               | D: Tat- Bcl-X <sub>L</sub> reduces the infarct volume and neurological deficits when administered before and after ischemic insult.                  | [22]      |
| Tat 47-57 | GDNF                                             | Evaluation whether IV administration of Tat-GDNF prevent brain injury after transient focal ischemia.                                            | <i>In vivo</i>               | D: After IV administration, the Tat-GDNF protein reaches the ischemic zone and reduced the brain injury and infarction zone.                         | [23]      |
| Tat 47-57 | Ritonavir loaded nanoparticles                   | Measuring radioactivity of ritonavir in brain tissue digest after decapitation of mice at different time points.                                 | <i>In vivo</i>               | Q: The brain drug level was 800-fold higher than that with drug in solution at two weeks (0.1 µg/g (solution) versus 80.3 µg/g (Tat-nanoparticles)). | [25]      |
| Tat       | Doxorubicin loaded transferrin ligated liposomes | The amount of doxorubicin in brain homogenate was evaluated using HPLC at different time points after IV injection in rats.                      | <i>In vivo</i>               | Q: Tf-Penetratin liposomes showed max brain penetration after 24h (about 2.89% ID/g).                                                                | [27]      |

## Supplementary Information

**S1 Table. Overview literature studies describing brain delivery by cell-penetrating peptides.**

| CPP       | Cargo                                                                                  | Technique                                                                                                                                                     | <i>In vivo/<br/>in vitro</i> | (Quantitative) result*                                                                                                                                                                         | Reference |
|-----------|----------------------------------------------------------------------------------------|---------------------------------------------------------------------------------------------------------------------------------------------------------------|------------------------------|------------------------------------------------------------------------------------------------------------------------------------------------------------------------------------------------|-----------|
| Tat       | Quantum dots                                                                           | Rats were infused intra-arterially and after euthanizing the rat, the brain was isolated and quantum dot fluorescence was evaluated.                          | <i>In vivo</i>               | D: If quantum dots are conjugated to Tat, the brain tissue was labeled. Histological data confirm the passage across the endothelial cell line of the blood-brain barrier.                     | [31]      |
| D-Tat     | <sup>99m</sup> Tc-Tricarbonyl and fluorescein-5-maleimide                              | Biodistribution was evaluated in mice. At several time points after IV injection, tissues were evaluated by fluorescence microscopy and radiometric analysis. | <i>In vivo</i>               | D: Little brain permeation was determined.                                                                                                                                                     | [32]      |
| Tat       | G <sub>3</sub> R <sub>6</sub> -cholesterol (conjugated to Tat and forms nanoparticles) | 4h after i.v. injection of the nanoparticles, rabbit brain sections were evaluated for FITC-loaded nanoparticles using a confocal microscope.                 | <i>In vivo</i>               | D: FITC was detected in the brain sections when coupled to CG <sub>3</sub> R <sub>6</sub> TAT nanoparticles (not if not coupled to nanoparticles), indicating the nanoparticles cross the BBB. | [34]      |
| Tat 47-57 | Cholesterol liposomes loaded with coumarin-6                                           | After i.v. injection of the coumarin-6 loaded TAT-liposomes in mice, the coumarin-6 concentration was determined in brain tissue.                             | <i>In vivo</i>               | D: The AUC (0-t) for TAT-liposomes was 1.79 to 2.54 times higher than non-conjugated liposomes.                                                                                                | [35]      |

## Supplementary Information

**S1 Table. Overview literature studies describing brain delivery by cell-penetrating peptides.**

| CPP           | Cargo                                                             | Technique                                                                                                                                                                                                                                                                                                      | <i>In vivo/ in vitro</i> | (Quantitative) result*                                                                                                                                                                                                                                                                                                              | Reference |
|---------------|-------------------------------------------------------------------|----------------------------------------------------------------------------------------------------------------------------------------------------------------------------------------------------------------------------------------------------------------------------------------------------------------|--------------------------|-------------------------------------------------------------------------------------------------------------------------------------------------------------------------------------------------------------------------------------------------------------------------------------------------------------------------------------|-----------|
| (D-)Tat 47-57 | Liposomes                                                         | <i>In vivo</i> biodistribution study in mice of (D-)Tat-coupled liposomes loaded with coumarin-6. At different time points after IV injection, the concentration of coumarin-6 was determined <i>i.a.</i> in brain tissue. Capillary depletion study was used to demonstrate distribution to brain parenchyma. | <i>In vivo</i>           | Q: The concentration of coumarin-6 delivered using (D-)Tat-coupled liposomes was 2 to 2.5 times higher than liposomes coupled to a Tat analogue with basic residues replaced by glycine and glutamic acid residues.                                                                                                                 | [36]      |
| Tat 48-57     | FITC doped silica nanoparticles (FSNPs)                           | The Tat-FSNPs were intra-arterially injected into rats. After completing the procedure, the rats were decapitated and the brain was sliced into 4 pieces and imaged using a fluorescence microscope.                                                                                                           | <i>In vivo</i>           | D: The images confirm labeling of branches of the right middle cerebral artery. Thus, not the nanoparticles crossed the blood-brain barrier.                                                                                                                                                                                        | [37]      |
| Tat 46-57     | Doxorubicin loaded nanoparticles (and co-modified with T7 ligand) | <i>In vivo</i> imaging and evaluation of survival time of tumor bearing mice.                                                                                                                                                                                                                                  | <i>In vivo</i>           | D/B: Compared to control liposomes, the TAT-T7 co-modified doxorubicin-loaded liposomes markedly accumulated in the glioma brain tumor. Also the survival time of these mice significantly increased.                                                                                                                               | [40]      |
| Tat 47-57     | VIP                                                               | Efficiency assay of traversing the BBB by fluorimetry; food intake assay and evaluation of effect on scopolamine induced amnesia.                                                                                                                                                                              | <i>In vivo</i>           | Q: After i.p. injection, the brain uptake efficiency of VIP-TAT (1.81) was twice as high as that of VIP (0.78).<br>B: VIP-TAT had a significantly stronger anorexigenic effect than VIP.<br>Q/B: Administration of VIP-TAT significantly inhibited stronger than VIP alone the reduction of the latent time induced by scopolamine. | [41]      |

## Supplementary Information

**S1 Table. Overview literature studies describing brain delivery by cell-penetrating peptides.**

| CPP              | Cargo                                                      | Technique                                                                                                                                                                                                                                                                                         | <i>In vivo/ in vitro</i> | (Quantitative) result*                                                                                                                                                                                    | Reference |
|------------------|------------------------------------------------------------|---------------------------------------------------------------------------------------------------------------------------------------------------------------------------------------------------------------------------------------------------------------------------------------------------|--------------------------|-----------------------------------------------------------------------------------------------------------------------------------------------------------------------------------------------------------|-----------|
| Tat 47-57        | BRBP1 (and linked to the proapoptotic peptide KLA as well) | IV injection of fluorescently labeled BRBP1-TAT-KLA in mice with breast cancer brain metastasis.                                                                                                                                                                                                  | <i>In vivo</i>           | D: Compared to TAT-KLA, BRBP1-TAT-KLA showed higher fluorescence intensity in the brain metastasis lesions.                                                                                               | [44]      |
| R7-myristoylated | -                                                          | NIR fluorescence imaging after IV injection + immunohistochemical staining.                                                                                                                                                                                                                       | <i>In vivo</i>           | D: Presence of fluorescently labeled vector demonstrated.                                                                                                                                                 | [9]       |
| rR9              | RVG29-cargo (plasmid DNA)                                  | Evaluation of luciferase activity of in several tissues after injection of rR9-RVG29-pGL3 (gene) construct in the tail vein of mice.                                                                                                                                                              | <i>In vivo</i>           | B: At 72h, the luciferase expression was 3-fold higher than for the control group.                                                                                                                        | [21]      |
| R8               | RGD                                                        | Translocation across an <i>in vitro</i> BBB model AND <i>in vivo</i> imaging in C6 glioma bearing mouse model.                                                                                                                                                                                    | <i>In vitro/ In vivo</i> | D: R8-RGD reached the brain and accumulated in the glioma foci. Also <i>in vitro</i> , R8-RGD crossed the BBB.                                                                                            | [24]      |
| R8               | Liposomes                                                  | <i>In vivo</i> biodistribution study of R8-coupled liposomes loaded with coumarin-6. At different time points after IV injection, the concentration of coumarin-6 was determined <i>i.a.</i> in brain tissue. Capillary depletion study was used to demonstrate distribution to brain parenchyma. | <i>In vivo</i>           | Q: The concentration of coumarin-6 delivered using R8-coupled liposomes was 3.5 times higher than liposomes coupled to a Tat analogue with basic residues replaced by glycine and glutamic acid residues. | [36]      |
| R2-R5            | EM-1 analogs                                               | Antinociceptive test                                                                                                                                                                                                                                                                              | <i>In vivo</i>           | D: Unless the decreased affinity for the opioid receptor, the vectorized analogs showed potent antinociceptive effect, partly caused by the improved bioavailability.                                     | [29]      |

## Supplementary Information

**S1 Table. Overview literature studies describing brain delivery by cell-penetrating peptides.**

| CPP                                          | Cargo                                                             | Technique                                                                                                                                                         | <i>In vivo/<br/>in vitro</i> | (Quantitative) result*                                                                                                                                                  | Reference |
|----------------------------------------------|-------------------------------------------------------------------|-------------------------------------------------------------------------------------------------------------------------------------------------------------------|------------------------------|-------------------------------------------------------------------------------------------------------------------------------------------------------------------------|-----------|
| Oligo-arginine                               | Transferrin ligated liposomes                                     | Rat were IV injected with vectorized liposomes and at different time points, brain was isolated and evaluated using NIR imaging.                                  | <i>In vivo</i>               | D: The brain penetration of Tf-PR-liposomes was 8-fold greater than plain liposomes.                                                                                    | [30]      |
| R11                                          | No cargo, but FITC labeled.                                       | Evaluation of immunoreactivity (using goat anti-FITC antibodies) in mouse brain sections after systemic administration of 11R-FITC.                               | <i>In vivo</i>               | D: Strong immunoreactivity was observed in vessels and surrounding cells of cortex, striatum and thalamus, which was not seen when systemically injecting 11E-FITC.     | [43]      |
| pVEC                                         | pVEC covalently attached to gHo (glioma homing sequence) = gHoPe2 | Evaluation of presence of FAM-labeled gHoPe2, IV injected in mice, in cryosections of the brain.                                                                  | <i>In vivo</i>               | D: In intracranial brain tumor model, the gHoPe2-FAM peptides were present in the intracranial tumors, not in healthy brain tissue. Thus the construct crossed the BBB. | [20]      |
| Mastoparan                                   | Doxorubicin loaded transferrin liposomes                          | The amount of doxorubicin in brain homogenate was evaluated using HPLC at different time points after IV injection in rats.                                       | <i>In vivo</i>               | D: Accumulation of Tf-Mastoparan liposomes was lower compared to Tf-Tat and Tf-Penetratin liposomes.                                                                    | [27]      |
| (RXRRBR)2XB                                  | AMO (antisense morpholino oligonucleotides)                       | IV injection to mice (single time and multiple time injection) and evaluation of presence of fluorescence in different brain areas using fluorescence microscopy. | <i>In vivo</i>               | D: Fluorescence was widely detected throughout the brain and increased when multiple injections were given.                                                             | [33]      |
| PepFect 32 (PepFect 14-Angiopep-2 construct) | pDNA                                                              | <i>In vitro</i> Transwell experiment. Transport across the bEnd.3 layer was demonstrated by measuring plasmid transfection in U87 cells.                          | <i>In vitro</i>              | Q: PepFect 32 showed the most efficient transfection of the luciferase-expressing plasmid in U87 cells.                                                                 | [38]      |



## Supplementary Information

**S1 Table. Overview literature studies describing brain delivery by cell-penetrating peptides.**

| CPP | Cargo | Technique                                                                                         | <i>In vivo/<br/>in vitro</i> | (Quantitative) result*                                                                                                                                                     | Reference |
|-----|-------|---------------------------------------------------------------------------------------------------|------------------------------|----------------------------------------------------------------------------------------------------------------------------------------------------------------------------|-----------|
| LNP | pDNA  | Evaluation of <i>in vitro</i> transport of LNP-modified pDNA nanoparticles across the BMEC layer. | <i>In vitro</i>              | Q: P <sub>app</sub> of LNP-modified pDNA nanoparticles was $92.43 \times 10^{-6}$ cm/s, while if not LNP-modified, the P <sub>app</sub> was $\leq 65 \times 10^{-6}$ cm/s. | [42]      |

\* Q: Quantitative result; B: biological effect; D: effect described.

## References

- [1] Rousselle C., Clair P., Tamsamani J., Scherrmann J.-M. Improved Brain Delivery of Benzylpenicillin with a Peptide-vector-mediated Strategy. *Journal of Drug Targeting* **10**, 309-315 (2002).
- [2] Rousselle C., Clair P., Smirnova M., Kolesnikov Y., Pasternak G.W., Gac-Breton S., Rees A.R., Scherrmann J.-M., Tamsamani J. Improved Brain Uptake and Pharmacological Activity of Dalargin Using a Peptide-Vector-Mediated Strategy. *Journal of Pharmacology and Experimental Therapeutics* **306**, 371-376 (2003).
- [3] Rousselle C., Clair P., Lefauconnier J.-M., Kaczorek M., Scherrmann J.-M., Tamsamani J. New Advances in the Transport of Doxorubicin through the Blood-brain barrier by a Peptide Vector-Mediated Strategy. *Molecular Pharmacology* **57**, 679-686 (2000).
- [4] Rousselle C., Smirnova M., Clair P., Lefauconnier J.-M., Chavanieu A., Calas B, Scherrmann J.-M., Tamsamani J. Enhanced Delivery of Doxorubicin into the Brain via a Peptide-Vector-Mediated Strategy: Saturation Kinetics and Specificity. *Journal of Pharmacology and Experimental Therapeutics* **296**, 124-131 (2001).
- [5] Blanc E., Bonnafous C., Merida P., Cisternino S., Clair P., Scherrmann J.-M., Tamsamani J. Peptide-vector strategy bypasses P-glycoprotein efflux, and enhances brain transport and solubility of paclitaxel. *Anti-cancer drugs* **15**, 947-954 (2004).
- [6] Tamsamani J., Bonnafous C., Rousselle C., Fraisse Y., Clair P., Granier L.-A., Rees A.R., Kaczorek M., Scherrmann J.-M. Improved Brain Uptake and Pharmacological Activity Profile of Morphine-6-Glucuronide Using a Peptide Vector-Mediated Strategy. *Journal of Pharmacology and Experimental Therapeutics* **313**, 712-719 (2005).
- [7] Bolton S.J., Jones D.N.C., Darker J.G., Eggleston D.S., Hunter A.J., Walsh F.S. Cellular uptake and spread of the cell-permeable peptide penetratin in adult rat brain. *European Journal of Neuroscience* **12**, 2847-2855 (2000).
- [8] Wang Q., Gou X., Xiong L., Jin W., Chen S., Hou L., Xu L. Trans-activator of Transcription-mediated Delivery of NEP1-40 Protein into the Brain Has a Neuroprotective Effect against Focal Cerebral Ischemic Injury via Inhibition of Neuronal Apoptosis. *Anesthesiology* **108**, 1071-1080 (2008).
- [9] Pham W., Zhao B.-Q., Lo E.H., Medarova Z., Rosen B., Moore A. Crossing the blood-brain barrier: A potential application of myristoylated polyarginine for in vivo neuroimaging. *NeuroImage* **28**, 287-292 (2005).
- [10] Aarts M., Liu Y., Liu L., Besshoh S., Arundine M., Gurd J.W., Wang Y.-T., Salter M.W., Tymianski M. Treatment of Ischemic Brain Damage by Perturbing NMDA Receptor-PSD-95 Protein Interactions. *Science* **298**, 846-850 (2002).
- [11] Schwarze S.R., Ho A., Vocero-Akbani A., Dowdy S.F. In Vivo Protein Transduction: Delivery of a Biologically Active Protein into the Mouse. *Science* **285**, 1569-1572 (1999).
- [12] Simon M.J., Kang W.H., Gao S., Banta S., Morrison III B. TAT Is Not Capable of Transcellular Delivery Across an Intact Endothelial Monolayer *In Vitro*. *Annals of Biomedical Engineering* **39**, 394-401 (2010).

- [13] Liu L., Guo K., Lu J., Venkatraman S.S., Lu D., Ng K.C., Ling E.-A., Mochhala S., Yang Y.-Y. Biologically active core/shell nanoparticles self-assembled from cholesterol-terminated PEG-TAT for drug delivery across the blood-brain barrier. *Biomaterials* **29**, 1509-1517 (2008).
- [14] Tian X.-h., Wei F., Wang T.-x., Wang D., Wang J., Lin X.-n., Wang P., Ren L. Blood-brain barrier transport of Tat peptide and polyethylene glycol decorated gelatin-siloxane nanoparticle. *Materials Letters* **68**, 94-96 (2012).
- [15] Bright R., Steinberg G.K., Mochly-Rosen D.  $\delta$ PKG mediates microcerebrovascular dysfunction in acute ischemia and in chronic hypertensive stress in vivo. *Brain Research* **1144**, 146-155 (2007).
- [16] Yu R., Guo X., Huang L., Zeng Z., Zhang H. The novel peptide PACAP-TAT with enhanced traversing ability attenuates the severe injury induced by repeated smoke inhalation. *Peptides* **38**, 142-149 (2012).
- [17] Dietz G.P.H., Valbuena P.C., Dietz B., Meuer K., Müller P., Weishaupt J.H., Bähr M. Application of a blood-brain-barrier-penetrating form of GDNF in a mouse model for Parkinson's disease. *Brain Research* **1082**, 61-66 (2006).
- [18] Tian X.-h., Wei F., Wang T.-x., Wang P., Lin X.-n., Wang J., Wang D., Ren L. In vitro and in vivo studies on gelatin-siloxane nanoparticles conjugated with SynB peptide to increase drug delivery to the brain. *International Journal of Nanomedicine* **7**, 1031-1041 (2012).
- [19] Liu L., Venkatraman S.S., Yang Y.-Y., Guo K., Lu J., He B., Mochhala S., Kan L. Polymeric Micelles Anchored With TAT for Delivery of Antibiotics Across the Blood-Brain Barrier. *Peptide Science* **90**, 617-623 (2008).
- [20] Eriste E., Kurrikoff K., Suhorutsenko J., Oskolkov N., Copolovici D.M., Jones S., Laakkonen P., Howl J., Langel Ü. Peptide-Based Glioma-Targeted Drug Delivery Vector gHoPe2. *Bioconjugate Chemistry* **24**, 305-313 (2013).
- [21] Gong C., Li X., Xu L., Zhang Y.-H. Target delivery of a gene into the brain using the RVG29-oligoarginine peptide. *Biomaterials* **33**, 3456-3463 (2012).
- [22] Kilic E., Dietz G.P.H., Hermann D.M., Bähr M. Intravenous TAT-Bcl-XL Is Protective after Middle Cerebral Artery Occlusion in Mice. *Annals of Neurology* **52**, 617-622 (2002).
- [23] Kilic Ü, Kilic E., Dietz G.P.H., Bähr M. Intravenous TAT-GDNF Is Protective After Focal Cerebral Ischemia in Mice. *Stroke* **34**, 1304-1310 (2003).
- [24] Liu Y., Ran R., Chen J., Kuang Q., Tang J., Mei L., Zhang Q., Gao H., Zhang Z., He Q. Paclitaxel loaded liposomes decorated with a multifunctional tandem peptide for glioma targeting. *Biomaterials* **35**, 4835-4847 (2014).
- [25] Rao K.S., Reddy M.K., Horning J.L., Labhasetwar V. TAT-conjugated nanoparticles for the CNS delivery of anti-HIV drugs. *Biomaterials* **29**, 4429-4438 (2008).
- [26] Skrlj N., Drevensek G., Hudoklin S., Romih R., Curin Serbec V., Dolinar M. Recombinant Single-Chain Antibody with the Trojan Peptide Penetratin Positioned in the Linker Region Enables Cargo Transfer Across the Blood-Brain Barrier. *Applied Biochemistry and Biotechnology* **169**, 159-169 (2013).

- [27] Sharma G., Modgil A., Zhong T., Sun C., Singh J. Influence of Short-Chain Cell-Penetrating Peptides on Transport of Doxorubicin Encapsulating Receptor-Targeted Liposomes Across Brain-Endothelial Barrier. *Pharmaceutical Research* **31**, 1194-1209 (2014).
- [28] Xia H., Gao X., Gu G., Liu Z., Hu Q., Tu Y., Song, Q., Yao L., Pang Z., Jiang X., Chen J., Chen H. Penetratin-functionalized PEG-PLA nanoparticles for brain drug delivery. *International Journal of Pharmaceutics* **436**, 840-850 (2012).
- [29] Wang C.-l., Guo C., Wang Y.-q., Zhou Y., Li Q., Ni L.-m., Wang R. Synthesis and antinociceptive effects of endomorphin-1 analogs with C-terminal linked by oligoarginine. *Peptides* **32**, 293-299 (2011).
- [30] Sharma G., Modgil A., Layek B., Arora K., Sun C., Law B., Singh J. Cell penetrating peptide tethered bi-ligand liposomes for delivery to brain *in vivo*: Biodistribution and transfection. *Journal of Controlled Release* **167**, 1-10 (2013).
- [31] Santra S., Yang H., Stanley J.T., Holloway P.H., Moudgil B.M., Walter G., Mericle R.A. Rapid and effective labeling of brain tissue using TAT-conjugated CdS:Mn/ZnS quantum dots. *Chemical Communications* **25**, 3144-3146 (2005).
- [32] Bullock K.E., Dyszlewski M., Prior J.L. Pica C.M., Sharma V., Piwnica-Worms D. Characterization of Novel Histidine-Tagged Tat-Peptide Complexes Dual-Labeled with <sup>99m</sup>Tc-Tricarboxyl and Fluorescein for Scintigraphy and Fluorescence Microscopy. *Bioconjugate Chemistry* **13**, 1226-1237 (2002).
- [33] Du L, Kayali R, Bertoni C, Fike F, Hu H, et al. (2011) Arginine-rich cell-penetrating peptide dramatically enhances AMO-mediated ATM aberrant splicing correction and enables delivery to brain and cerebellum. *Hum Mol Genet* 20: 3151-3160.
- [34] Wang H, Xu K, Liu L, Tan JPK, Chen Y, et al. (2010) The efficacy of self-assembled cationic antimicrobial peptide nanoparticles against *Cryptococcus neoformans* for the treatment of meningitis. *Biomaterials* 31: 2874-2881.
- [35] Qin Y, Chen H, Yuan W, Kuai R, Zhang Q, et al. (2011) Liposome formulated with TAT-modified cholesterol for enhancing the brain delivery. *Int J Pharm* 419: 85-95.
- [36] Qin Y, Zhang Q, Chen H, Yuan W, Kuai R, et al. (2012) Comparison of four different peptides to enhance accumulation of liposomes into the brain. *J Drug Target* 20: 235-245.
- [37] Santra S, Yang H, Dutta D, Stanley JT, Holloway PH, et al. (2004) TAT conjugated, FITC doped silica nanoparticles for bioimaging applications. *Chem Commun* 2004: 2810-2811.
- [38] Srimanee A, Regberg J, Hallbrink M, Kurrikoff K, Veiman K-L, Vajragupta O, Langel U (2014) Peptide-Based Delivery of Oligonucleotides Across Blood-Brain Barrier Model. *Int J Pept Res Ther* 20: 169-178.
- [39] Liu H, Zhang W, Ma L, Fan L, Gao F, Ni J, Wang R (2014) The improved blood-brain barrier permeability of endomorphin-1 using the cell-penetrating peptide SynB3 with three different linkages. *Int J Pharm* 476: 1-8.
- [40] Zong T, Mei L, Gao H, Cai W, Zhu P, Shi K, Chen J, Wang Y, Gao F, He Q (2014) Synergistic Dual-Ligand Doxorubicin Liposomes Improve Targeting and Therapeutic Efficacy of Brain Glioma in Animals. *Mol Pharmaceutics* 11: 2346-2357.

[41] Yu R, Yang Y, Cui Z, Zheng L, Zeng Z, Zhang H (2014) Novel peptide VIP-TAT with higher affinity for PAC1 inhibited scopolamine induced amnesia. *Peptides* 60: 41-50.

[42] Yao H, Wang K, Wang Y, Wang S, Li J, Lou J, Ye L, Yan X, Lu W, Huang R (2015) Enhanced blood-brain barrier penetration and glioma therapy mediated by a new peptide modified gene delivery system. *Biomaterials* 37: 345-352.

[43] Gotanda Y, Wei F-Y, Haranda H, Ohta K, Nakamura K-i, Tomizawa K, Ushijima K (2014) Efficient Transduction of 11 Poly-arginine Peptide in an Ischemic Lesion of Mouse Brain. *J Stroke Cerebrovasc* 23: 2023-2030.

[44] Fu B, Long W, Zhang Y, Zhang A, Miao F, Shen Y, Pan N, Gan G, Nie F, He Y, Zhang J, Teng G (2015) Enhanced antitumor effects of the BRBP1 compound peptide BRBP1-TAT-KLA on human brain metastatic breast cancer. *Sci Rep* 5: 8029.

Remarks:

Ref [7]: Penetratin (directly injected in brain) cause in a dose > 1 µg neurotoxic cell death and recruitment of inflammatory cells. At doses < 1 µg less pronounced toxic effect.
