# Supplementary material for: Cell-Penetrating Peptides Selectively Cross the Blood-Brain Barrier In Vivo
Source: PubMed Central journal article supplement (PMC4605843; doi:10.1371/journal.pone.0139652), 2015-10-14
Supplement: pone.0139652.s004.pdf [file pone.0139652.s004.pdf]

**S1 Text. Oasis<sup>®</sup> WCX SPE sample preparation procedure of the serum samples of TP10 and TP10-2.**

At the specified time points, 100  $\mu$ l aliquots were transferred to tubes containing 100  $\mu$ l of a 4% (V/V) phosphoric acid solution and were consequently heated at 95°C during 5 min. After cooling the samples on an ice-bath, interfering compounds were removed by solid phase extraction using a positive pressure-96 processor (Waters). Before application of the acidified sample on the Oasis<sup>®</sup> WCX  $\mu$ elution plate, which was conditioned with 200  $\mu$ l of methanol and equilibrated with 200  $\mu$ l ultrapure water, the internal standard was added (TP10 for TP10-2 and vice versa). After loading the samples, the Oasis<sup>®</sup> WCX  $\mu$ elution plate was washed using successively 200  $\mu$ l of a 5% ammoniumhydroxide and 200  $\mu$ l of a 70% acetonitrile solution. The peptides were eluted using four times 25  $\mu$ L of a 1% TFA in 90% acetonitrile solution. The resulting eluate was analyzed by HPLC-UV.
